# Supplementary material
Source: HighWire-hosted journal article supplement (https://bibliotheek.ehb.be/content/102/5/428)
Supplement: inline-supplementary-material-1 [file inline-supplementary-material-1.pdf]

### **Supplementary material 1. Missing data and multiple imputation**

Missing data is a problem in longitudinal cohort studies such as ALSPAC. 35.3% of the original live births had missing data on burn outcome between birth and 2, 39% between 2 and 4.5 years, and 60% between 5 and 11. Considering the number of cases who reported at least one burn outcome between birth and age 11 (N=12996), the corresponding figures were 26.5%, 30.5% and 54.6%.

Of those children with complete outcome data (burn yes/no), 84 % of children between birth and 2 years had no missing values in any of the predictors or confounders, 14% were missing on 1 and 2% were missing on 2 or more. Between 2-4.5 years, 78% had no missing values, 14% missing on 1 and 8% missing on 2 or more predictors or confounders. Between 5 and 11, the numbers were 83%, 12% and 5% respectively. The degree of missingness varied between variables (see tables S2 below).

Those with missing outcome data differed on a number of predictors and other potential confounders to those with outcome data (table S5). Hence, it is likely that without taking this into account, our results would be biased. Multiple imputation is a common technique used to correct for bias introduced by loss to follow-up (Sterne et al. 2009). We used multiple imputation by chained equations using the “mi” command in Stata v.14 (StataCorp. 2015). We imputed up to the number of participants who had reported at least one burn between birth and age 11 (N = 12996) using 20 imputations. Imputation model diagnostics were performed using the command ‘midiagplots’ which compares the distributions of the observed, imputed, and completed values (Eddings & Marchenko 2012). Binary variables and categorical variables used logistic, and ordinal regression, as appropriate, specified in the mi impute command. Normally distributed variables were incorporated using linear regression, and other continuous skewed variables were included using predictive mean matching (N=5 set as the number of closest observations/nearest neighbours from which to draw imputed values) in the imputation model. To identify auxiliary variables, we used logistic regressions to explore if the following factors were associated with missingness in our predictors and confounders: maternal age at delivery, levels of postnatal depression (8 weeks), presence of domestic violence in pregnancy, maternal education level, family adversity (as measured by the ALSPAC Family Adversity Index), socioeconomic deprivation (as measured by the Index of Multiple Deprivation) and ethnicity. All these variables were highly associated with missingness ( $p < 0.05$ ), helping to support the assumption of “missing at random”, and were included in the final imputation model, together with those included in the final logistic

regression models. We also included all burn outcome variables up to age 11 as well as earlier and later measures of the predictor variables.

## References

Sterne JA, White IR, Carlin JB, Spratt M, Royston P, Kenward MG, Wood AM, Carpenter JR. Multiple imputation for missing data in epidemiological and clinical research: potential and pitfalls. *BMJ* 2009; 38 :b2393.

Eddings W, Marchenko Y. Diagnostics for multiple imputation in Stata. *Stata Journal* 2012; 12(3):353

**Supplementary tables S2: UNIVARIABLE analyses using different datasets.**

**Table S.2.1 Pre-injury child, family and socio-economic characteristics of the children sustaining a burn between birth and 2 years compared to controls. Categorical variables are reported as percentages [95% confidence intervals] and continuous variables as mean [standard error]. IMD = Index of Multiple Deprivation.**

| Variables                | Age at measure    | All available data                  |                                  | Complete case       |                   | Imputed              |                   |
|--------------------------|-------------------|-------------------------------------|----------------------------------|---------------------|-------------------|----------------------|-------------------|
|                          |                   | Control<br>(N <sub>max</sub> =8074) | Burn<br>(N <sub>max</sub> =1484) | Control<br>(N=6856) | Burn<br>(N=1160)  | Control<br>(N=11156) | Burn<br>(N=1840)  |
| <b>% Outcome</b>         |                   | 84.5                                | 15.5                             | 85.5                | 14.5              | 85.8                 | 14.2              |
| <b>Child factors</b>     |                   |                                     |                                  |                     |                   |                      |                   |
| Gender                   | <i>birth</i>      | 50.7 [49.6, 51.8]                   | 58.1 [55.6, 60.6]                | 50.8 [49.7, 52.0]   | 58.7 [55.8, 61.5] | 50.5 [49.6, 51.5]    | 57.7 [55.2, 60.3] |
| - Male                   |                   | <i>N=8074</i>                       | <i>N=1484</i>                    |                     |                   |                      |                   |
| Gross motor score        | <i>6m</i>         | 16.1 [0.06]                         | 17.1 [0.17]                      | 16.0 [0.07]         | 17.0 [0.16]       | 16.3 [0.06]          | 17.3 [0.17]       |
|                          |                   | <i>N=8041</i>                       | <i>N=1398</i>                    |                     |                   |                      |                   |
| Fine motor score         | <i>18m</i>        | 26.7 [0.04]                         | 26.6 [0.08]                      | 26.7 [0.04]         | 26.6 [0.08]       | 26.7 [0.03]          | 26.5 [0.09]       |
|                          |                   | <i>N=7885</i>                       | <i>N=1401</i>                    |                     |                   |                      |                   |
| <b>Covariates</b>        |                   |                                     |                                  |                     |                   |                      |                   |
| Maternal education       | <i>32w gest</i>   | 14.5 [13.8, 15.3]                   | 16.2 [14.4, 18.2]                | 14.7 [13.9, 15.5]   | 17.2 [15.1, 19.4] | 12.8 [12.1, 13.4]    | 14.9 [13.2, 16.6] |
| - Degree                 |                   | <i>N=7903</i>                       | <i>N=1411</i>                    |                     |                   |                      |                   |
| Maternal parenting score | <i>6m</i>         | 10.4 [9.8, 11.1]                    | 12.7 [11.0, 14.5]                | 10.1 [9.4, 10.9]    | 12.2 [10.5, 14.3] | 11.3 [10.6, 11.9]    | 13.4 [11.7, 15.2] |
| - Worst decile           |                   | <i>N=8059</i>                       | <i>N=1404</i>                    |                     |                   |                      |                   |
| Marital status           | <i>8w gest</i>    | 13.5 [12.8, 14.3]                   | 22.5 [20.4, 24.7]                | 13.4 [12.6, 14.3]   | 20.3 [18.0, 22.7] | 17.1 [16.4, 17.9]    | 25.1 [22.8, 27.4] |
| - Never married          |                   | <i>N=7937</i>                       | <i>N=1445</i>                    |                     |                   |                      |                   |
| Family Adversity Index   | <i>8-32w gest</i> | 1.1 [0.02]                          | 1.5 [0.05]                       | 1.1 [0.02]          | 1.4 [0.05]        | 1.2 [0.02]           | 1.6 [0.05]        |
|                          |                   | <i>N=8074</i>                       | <i>N=1484</i>                    |                     |                   |                      |                   |
| IMD (quintiles)          | <i>6m</i>         | 17.7 [16.8, 18.6]                   | 22.5 [20.3, 24.9]                | 17.0 [16.1, 17.9]   | 21.6 [19.3, 24.0] | 20.8 [19.9, 21.6]    | 25.7 [23.4, 28.0] |
| - Most deprived          |                   | <i>N=7296</i>                       | <i>N=1270</i>                    |                     |                   |                      |                   |

**Table S.2.2. Pre-injury child, family and socio-economic characteristics of the children sustaining a burn between 2 and 4.5 years compared to controls.**

Categorical variables are reported as percentages [95% confidence intervals] and continuous variables as mean [standard error]. IMD = Index of Multiple Deprivation.

| Variables                | Age at measure | All available data                  |                                 | Complete case       |                   | Imputed              |                   |
|--------------------------|----------------|-------------------------------------|---------------------------------|---------------------|-------------------|----------------------|-------------------|
|                          |                | Control<br>(N <sub>max</sub> =8047) | Burn<br>(N <sub>max</sub> =992) | Control<br>(N=6688) | Burn<br>(N=784)   | Control<br>(N=11672) | Burn<br>(N=1324)  |
| <b>% Outcome</b>         |                | 89.0                                | 11.0                            | 89.5                | 10.5              | 89.8                 | 10.2              |
| <b>Child factors</b>     |                |                                     |                                 |                     |                   |                      |                   |
| Gender                   | birth          |                                     |                                 |                     |                   |                      |                   |
| - Male                   |                | 51.4 [50.3, 52.5]                   | 54.0 [50.9, 57.1]               | 51.2 [50.0, 52.4]   | 53.3 [49.8, 56.8] | 51.3 [50.4, 52.2]    | 53.9 [50.9, 57.0] |
| Gross motor score        | 6m             | 16.1 [0.06]<br>N=7700               | 16.6 [0.19]<br>N=933            | 16.0 [0.07]         | 16.3 [0.20]       | 16.4 [0.06]          | 16.8 [0.20]       |
| Fine motor score         | 18m            | 26.7 [0.03]<br>N=7755               | 26.6 [0.10]<br>N=936            | 26.7 [0.04]         | 26.6 [0.11]       | 26.7 [0.03]          | 26.5 [0.11]       |
| Temper tantrums          | 18m            | 27.6 [26.7, 28.7]<br>N=7704         | 29.3 [26.4, 32.3]<br>N=931      | 27.6 [26.6, 28.7]   | 28.9 [25.8, 32.1] | 28.9 [28.0, 29.8]    | 31.0 [27.6, 34.4] |
| - Often                  |                |                                     |                                 |                     |                   |                      |                   |
| <b>Covariates</b>        |                |                                     |                                 |                     |                   |                      |                   |
| Maternal education       | 32w gest       | 14.7 [13.9, 15.5]<br>N=7830         | 16.8 [14.6, 19.3]<br>N=964      | 15.0 [14.2, 15.9]   | 18.4 [15.8, 21.3] | 12.8 [12.2, 13.5]    | 15.3 [13.2, 17.5] |
| - Degree                 |                |                                     |                                 |                     |                   |                      |                   |
| Maternal parenting score | 6m             | 10.5 [9.8, 11.2]<br>N=7719          | 9.4 [7.7, 11.4]<br>N=936        | 10.3 [9.6, 11.1]    | 9.3 [7.5, 11.6]   | 11.6 [11.0, 12.3]    | 10.9 [8.7, 13.1]  |
| - Worst decile           |                |                                     |                                 |                     |                   |                      |                   |
| Marital status           | 8w gest        | 14.1 [13.4, 14.9]<br>N=7894         | 21.5 [19.0, 24.2]<br>N=962      | 13.4 [12.6, 14.3]   | 20.1 [17.4, 23.0] | 17.5 [16.8, 18.2]    | 24.9 [22.1, 27.6] |
| - Never married          |                |                                     |                                 |                     |                   |                      |                   |
| Family Adversity Index   | 8-32w gest     | 1.1 [0.02]<br>N=8047                | 1.2 [0.05]<br>N=992             | 1.1 [0.02]          | 1.3 [0.06]        | 1.2 [0.01]           | 1.5 [0.05]        |
| IMD (quintiles)          | 38m            | 18.4 [17.5, 19.3]<br>N=7463         | 19.6 [17.1, 22.4]<br>N=892      | 17.1 [16.2, 18.0]   | 18.3 [15.7, 21.1] | 21.6 [20.8, 22.5]    | 22.4 [19.8, 25.0] |
| - Most deprived          |                |                                     |                                 |                     |                   |                      |                   |

**Table S.2.3. Pre-injury child, family and socio-economic characteristics of the children sustaining a burn between 5 and 11 years compared to controls.**

Categorical variables are reported as percentages [95% confidence intervals] and continuous variables as mean [standard error]. IMD = Index of Multiple Deprivation.

| Variables                | Age at measure    | All available data               |                                  | Complete case     |                   | Imputed           |                   |
|--------------------------|-------------------|----------------------------------|----------------------------------|-------------------|-------------------|-------------------|-------------------|
|                          |                   | % No<br>(N <sub>max</sub> =5111) | % Yes<br>(N <sub>max</sub> =795) | % No<br>(N=4185)  | % Yes<br>(N=567)  | % No<br>(N=11668) | % Yes<br>(N=1328) |
| <b>% Outcome</b>         |                   | 86.5                             | 13.5                             | 88.1              | 11.9              | 89.8              | 10.2              |
| <b>Predictors</b>        |                   |                                  |                                  |                   |                   |                   |                   |
| Gender                   | <i>birth</i>      | 51.0 [49.6, 52.4]                | 45.3 [41.8, 48.8]                | 51.1 [49.6, 52.7] | 47.1 [43.0, 51.2] | 52.2 [51.2, 53.2] | 46.1 [41.7, 50.6] |
| - Male                   |                   | <i>N=5111</i>                    | <i>N=795</i>                     |                   |                   |                   |                   |
| Gross motor score        | <i>42m</i>        | 26.3 [0.05]                      | 26.1 [0.13]                      | 26.3 [0.05]       | 26.0 [0.15]       | 26.4 [0.04]       | 26.1 [0.19]       |
|                          |                   | <i>N=4981</i>                    | <i>N=732</i>                     |                   |                   |                   |                   |
| Fine motor score         | <i>42m</i>        | 29.9 [0.06]                      | 30.0 [0.15]                      | 29.9 [0.06]       | 30.0 [0.17]       | 29.7 [0.04]       | 29.7 [0.18]       |
|                          |                   | <i>N=4978</i>                    | <i>N=732</i>                     |                   |                   |                   |                   |
| Temper tantrums          | <i>42m</i>        | 14.4 [13.5, 15.4]                | 18.8 [16.1, 21.8]                | 14.1 [13.1, 15.2] | 17.8 [14.9, 21.2] | 16.3 [15.4, 17.1] | 20.4 [17.4, 23.4] |
| - Often                  |                   | <i>N=4941</i>                    | <i>N=729</i>                     |                   |                   |                   |                   |
| Hyperactivity            | <i>47m</i>        | 12.6 [11.7, 13.6]                | 17.3 [14.7, 20.2]                | 12.6 [11.6, 13.7] | 16.0 [13.2, 19.3] | 14.3 [13.6, 15.1] | 18.6 [15.9, 21.4] |
| - Abnormal               |                   | <i>N=4938</i>                    | <i>N=718</i>                     |                   |                   |                   |                   |
| Conduct problems         | <i>47m</i>        | 11.6 [10.7, 12.5]                | 15.5 [13.0, 18.3]                | 11.2 [12.3, 14.3] | 14.6 [12.0, 17.8] | 13.4 [12.7, 14.2] | 17.8 [15.3, 20.4] |
| - Abnormal               |                   | <i>N=4938</i>                    | <i>N=718</i>                     |                   |                   |                   |                   |
| Coordination problems    | <i>54m</i>        | 3.1 [2.6, 3.6]                   | 5.4 [4.0, 7.3]                   | 3.0 [2.5, 3.6]    | 5.6 [4.0, 7.9]    | 3.6 [3.1, 4.0]    | 6.5 [4.6, 8.4]    |
| - Yes                    |                   | <i>N=4960</i>                    | <i>N=723</i>                     |                   |                   |                   |                   |
| Handedness               | <i>42m</i>        | 32.7 [31.4, 34.0]                | 32.1 [28.9, 35.6]                | 32.7 [31.3, 34.1] | 30.3 [26.7, 34.3] | 35.7 [34.6, 36.7] | 34.5 [30.2, 38.8] |
| - Left/mixed             |                   | <i>N=4959</i>                    | <i>N=731</i>                     |                   |                   |                   |                   |
| <b>Covariates</b>        |                   |                                  |                                  |                   |                   |                   |                   |
| Maternal education       | <i>32w gest</i>   | 18.1 [17.1, 19.2]                | 19.7 [17.0, 22.7]                | 18.3 [17.1, 19.5] | 21.0 [17.8, 24.5] | 12.8 [12.1, 13.4] | 15.9 [13.6, 18.2] |
| - Degree                 |                   | <i>N=5037</i>                    | <i>N=753</i>                     |                   |                   |                   |                   |
| Maternal parenting score | <i>18m</i>        | 8.4 [7.6, 9.2]                   | 11.4 [9.3, 13.9]                 | 8.2 [7.4, 9.1]    | 9.7 [7.5, 12.4]   | 9.9 [9.2, 10.5]   | 12.5 [10.1, 14.8] |
| - Worst decile           |                   | <i>N=5013</i>                    | <i>N=747</i>                     |                   |                   |                   |                   |
| Marital status           | <i>8w gest</i>    | 11.7 [10.8, 12.6]                | 15.2 [12.8, 17.9]                | 11.3 [10.4, 12.3] | 14.6 [12.0, 17.8] | 18.0 [17.3, 18.8] | 20.0 [16.7, 23.3] |
| - Never married          |                   | <i>N=5044</i>                    | <i>N=765</i>                     |                   |                   |                   |                   |
| Family Adversity Index   | <i>8-32w gest</i> | 0.97 [0.02]                      | 1.23 [1.12, 1.34]                | 0.94 [0.02]       | 1.15 [0.06]       | 1.25 [0.02]       | 1.43 [0.06]       |
|                          |                   | <i>N=5111</i>                    | <i>N=773</i>                     |                   |                   |                   |                   |
| IMD (quintiles)          | <i>38m</i>        | 15.6 [14.6, 16.7]                | 18.7 [15.8, 21.9]                | 14.8 [13.7, 15.9] | 17.1 [14.2, 20.4] | 22.4 [21.5, 23.3] | 23.3 [19.8, 26.9] |
| - Most deprived          |                   | <i>N=4734</i>                    | <i>N=637</i>                     |                   |                   |                   |                   |

**Supplementary tables S3. MULTIVARIABLE results from analyses using different datasets.**

**Table S3.1. All available data analyses, reporting odds ratios (OR) and 95% confidence intervals (CI).**

| Measure<br>(non-reference group) | Age<br>outcome | Age at<br>measure | Unadjusted |            | Adjusted 1* |            | Adjusted 2** |            | Adjusted 3*** |            |
|----------------------------------|----------------|-------------------|------------|------------|-------------|------------|--------------|------------|---------------|------------|
|                                  |                |                   | OR         | 95% CI     | OR          | 95% CI     | OR           | 95% CI     | OR            | 95% CI     |
| Gender (male)                    | 0-2y           | Birth             | 1.35       | 1.20, 1.51 | 1.32        | 1.17, 1.48 | 1.32         | 1.17, 1.49 | 1.37          | 1.21, 1.56 |
| Gross motor score                | 0-2y           | 6m                | 1.03       | 1.02, 1.04 | 1.03        | 1.02, 1.04 | 1.03         | 1.02, 1.04 | 1.03          | 1.02, 1.04 |
| Fine motor score                 | 0-2y           | 18m               | 0.98       | 0.97, 1.00 | 0.97        | 0.96, 0.99 | 0.98         | 0.96, 1.00 | 0.99          | 0.96, 1.01 |
| Gender (male)                    | 2-4.5y         | Birth             | 1.11       | 0.97, 1.27 | 1.09        | 0.94, 1.25 | 1.09         | 0.95, 1.25 | 1.08          | 0.93, 1.25 |
| Gross motor score                | 2-4.5y         | 6m                | 1.02       | 1.00, 1.03 | 1.01        | 1.00, 1.03 | 1.02         | 1.00, 1.03 | 1.02          | 1.00, 1.03 |
| Fine motor score                 | 2-4.5y         | 18m               | 0.99       | 0.97, 1.01 | 0.98        | 0.96, 1.01 | 0.98         | 0.96, 1.00 | 0.98          | 0.96, 1.00 |
| Temper tantrums (often)          | 2-4.5y         | 18m               | 1.25       | 0.98, 1.60 | 1.23        | 0.96, 1.58 | 1.24         | 0.96, 1.59 | 1.24          | 0.96, 1.59 |
| Gender (male)                    | 5-11y          | Birth             | 0.79       | 0.68, 0.92 | 0.81        | 0.69, 0.96 | 0.83         | 0.69, 0.98 | 0.87          | 0.72, 1.05 |
| Gross motor score                | 5-11y          | 42m               | 0.98       | 0.96, 1.01 | 0.98        | 0.95, 1.00 | 0.98         | 0.95, 1.00 | 0.97          | 0.94, 1.00 |
| Fine motor score                 | 5-11y          | 42m               | 1.01       | 0.99, 1.03 | 1.02        | 0.99, 1.05 | 1.02         | 1.00, 1.05 | 1.03          | 1.00, 1.05 |
| Temper tantrums (often)          | 5-11y          | 18m               | 1.30       | 1.14, 1.49 | 1.48        | 1.10, 1.99 | 1.48         | 1.10, 2.00 | 1.44          | 1.04, 1.99 |
| Hyperactivity (abnormal)         | 5-11y          | 47m               | 1.83       | 1.54, 2.19 | 1.29        | 1.01, 1.63 | 1.28         | 1.01, 1.64 | 1.19          | 0.91, 1.55 |
| Conduct problems<br>(abnormal)   | 5-11y          | 47m               | 1.81       | 1.51, 2.17 | 1.25        | 0.97, 1.60 | 1.21         | 0.94, 1.56 | 1.17          | 0.89, 1.54 |
| Coordination problems (yes)      | 5-11y          | 54m               | 1.80       | 1.26, 2.59 | 1.75        | 1.19, 2.57 | 1.79         | 1.22, 2.63 | 1.71          | 1.13, 2.58 |
| Handedness (left/mixed)          | 5-11y          | 42m               | 0.97       | 0.82, 1.15 | 0.94        | 0.79, 1.13 | 0.95         | 0.80, 1.14 | 0.87          | 0.72, 1.06 |

\* Adjusted 1: All child factors; \*\* Adjusted 2: Adjusted 1 + maternal education, maternal parenting score; \*\*\* Adjusted 3: Adjusted 2 + marital status, FAI (Family Adversity Index) and IMD (Index of Multiple Deprivation).

OR [95% CI] for confounders full model 0-2 years; maternal education (degree): 1.30 [1.09, 1.55], maternal parenting score (worst decile): 1.23 [1.01, 1.50], marital status (never married): 1.40 [1.18, 1.66], FAI: 1.11 [1.07, 1.16], IMD (worst quintile): 1.10 [0.90, 1.34].

OR [95% CI] for confounders full model 2-4.5 years; maternal education (degree): 1.34 [1.10, 1.64], maternal parenting score (worst decile): 0.89 [0.69, 1.15], marital status (never married): 1.53 [1.26, 1.87], FAI: 1.06 [1.00, 1.11], IMD (worst quartile): 0.98 [0.76, 1.25].

OR [95% CI] for confounders full model 5-11 years: maternal education (degree): 1.22 [0.98, 1.52], maternal parenting score (worst decile): 1.11 [0.82, 1.50], marital status (never married): 1.19 [0.92, 1.54], FAI: 1.09 [1.02, 1.16], IMD (worst quartile): 1.13 [0.85, 1.50].

Gross motor and fine motor scores entered as continuous variables.

**Table S3.2. Complete case analyses, reporting odds ratios (OR) and 95% confidence intervals (CI).**

| Measure<br>(non-reference group) | Age<br>outcome | Age at<br>measure | Unadjusted |            | Adjusted 1* |            | Adjusted 2* |            | Adjusted 3* |            |
|----------------------------------|----------------|-------------------|------------|------------|-------------|------------|-------------|------------|-------------|------------|
|                                  |                |                   | OR         | 95% CI     | OR          | 95% CI     | OR          | 95% CI     | OR          | 95% CI     |
| Gender (male)                    | 0-2y           | Birth             | 1.37       | 1.21, 1.56 | 1.36        | 1.20, 1.54 | 1.36        | 1.20, 1.55 | 1.37        | 1.21, 1.56 |
| Gross motor score                | 0-2y           | 6m                | 1.03       | 1.02, 1.04 | 1.03        | 1.02, 1.05 | 1.04        | 1.02, 1.05 | 1.03        | 1.02, 1.04 |
| Fine motor score                 | 0-2y           | 18m               | 0.99       | 0.97, 1.01 | 0.98        | 0.96, 1.00 | 0.98        | 0.96, 1.00 | 0.99        | 0.96, 1.01 |
| Gender (male)                    | 2-4.5y         | Birth             | 1.08       | 0.93, 1.26 | 1.07        | 0.93, 1.25 | 1.08        | 0.93, 1.25 | 1.08        | 0.93, 1.25 |
| Gross motor score                | 2-4.5y         | 6m                | 1.01       | 1.00, 1.02 | 1.01        | 1.00, 1.03 | 1.01        | 1.00, 1.03 | 1.01        | 0.99, 1.02 |
| Fine motor score                 | 2-4.5y         | 18m               | 0.98       | 0.96, 1.01 | 0.98        | 0.95, 1.00 | 0.98        | 0.95, 1.00 | 0.98        | 0.95, 1.00 |
| Temper tantrums (often)          | 2-4.5y         | 18m               | 1.17       | 0.90, 1.52 | 1.17        | 0.90, 1.52 | 1.18        | 0.90, 1.53 | 1.11        | 0.85, 1.44 |
| Gender (male)                    | 5-11y          | Birth             | 0.85       | 0.71, 1.01 | 0.86        | 0.72, 1.03 | 0.86        | 0.71, 1.03 | 0.87        | 0.72, 1.05 |
| Gross motor score                | 5-11y          | 42m               | 0.98       | 0.95, 1.00 | 0.97        | 0.94, 1.00 | 0.97        | 0.95, 1.00 | 0.97        | 0.94, 1.00 |
| Fine motor score                 | 5-11y          | 42m               | 1.01       | 0.99, 1.03 | 1.02        | 1.00, 1.05 | 1.02        | 1.00, 1.05 | 1.03        | 1.00, 1.05 |
| Temper tantrums (often)          | 5-11y          | 42m               | 1.61       | 1.18, 2.19 | 1.49        | 1.08, 2.05 | 1.49        | 1.08, 2.06 | 1.44        | 1.04, 1.99 |
| Hyperactivity (abnormal)         | 5-11y          | 47m               | 1.32       | 1.04, 1.69 | 1.20        | 0.92, 1.56 | 1.21        | 0.93, 1.57 | 1.19        | 0.91, 1.55 |
| Conduct problems<br>(abnormal)   | 5-11y          | 47m               | 1.36       | 1.06, 1.75 | 1.22        | 0.93, 1.60 | 1.22        | 0.93, 1.60 | 1.17        | 0.89, 1.54 |
| Coordination problems (yes)      | 5-11y          | 54m               | 1.93       | 1.29, 2.87 | 1.79        | 1.19, 2.70 | 1.78        | 1.18, 2.68 | 1.71        | 1.13, 2.58 |
| Handedness (left/mixed)          | 5-11y          | 42m               | 0.90       | 0.74, 1.09 | 0.88        | 0.72, 1.07 | 0.89        | 0.73, 1.08 | 0.87        | 0.72, 1.06 |

\* Adjusted 1: All child factors; \*\*Adjusted 2: Adjusted 1 + maternal education, maternal parenting score; \*\*\*Adjusted 3: Adjusted 2 + marital status, FAI (Family Adversity Index) and IMD (Index of Multiple Deprivation).

OR [95% CI] for confounders full model 0-2 years; maternal education (degree): 1.30 [1.09, 1.55], maternal parenting score (worst decile): 1.23 [1.01, 1.50], marital status (never married): 1.40 [1.18, 1.66], FAI: 1.11 [1.07, 1.16], IMD (worst quintile): 1.10 [0.90, 1.34].



OR [95% CI] for confounders full model 2-4.5 years; maternal education (degree): 1.34 [1.10, 1.64], maternal parenting score (worst decile): 0.89 [0.69, 1.15], marital status (never married): 1.53 [1.26, 1.87], FAI: 1.06 [1.00, 1.11], IMD (worst quartile): 0.98 [0.76, 1.25].

OR [95% CI] for confounders full model 5-11 years: maternal education (degree): 1.22 [0.98, 1.52], maternal parenting score (worst decile): 1.11 [0.82, 1.50], marital status (never married): 1.19 [0.92, 1.54], FAI: 1.09 [1.02, 1.16], IMD (worst quartile): 1.13 [0.85, 1.50].

Gross motor and fine motor scores entered as continuous variables.

**Supplementary table S4. Period prevalence of burns at each questionnaire time point.**

| <b>Period (months)</b> | <b>N answering questionnaire</b> | <b>Period prevalence N (%)*</b> | <b>Period prevalence – complete follow up**</b> |
|------------------------|----------------------------------|---------------------------------|-------------------------------------------------|
| <b>0-6</b>             | 11433                            | 172 (1.5)                       | 142 (1.5)                                       |
| <b>6-15</b>            | 11014                            | 683 (6.2)                       | 568 (6.1)                                       |
| <b>15-24</b>           | 10360                            | 784 (7.6)                       | 695 (7.4)                                       |
| <b>24-38</b>           | 10066                            | 676 (6.7)                       | 602 (6.7)                                       |
| <b>38-54</b>           | 9681                             | 424 (4.4)                       | 392 (4.4)                                       |
| <b>54-65</b>           | 8980                             | 191 (2.1)                       | 132 (2.3)                                       |
| <b>65-77</b>           | 8496                             | 160 (1.9)                       | 95 (1.7)                                        |
| <b>77-103</b>          | 8264                             | 190 (2.3)                       | 134 (2.4)                                       |
| <b>103-140</b>         | 7415                             | 336 (4.5)                       | 246 (4.3)                                       |

\* Proportion of participants reporting a burn/total number answering the burns questionnaire within each period.

\*\* Proportion of participants reporting a burn/total number that responded to every questionnaire within each of the three age periods (complete follow-up): 0-24 months = 9339, 24-54 months = 8933, 54-140 months = 5658.

**Supplementary table S5. Distribution of predictors and confounders included in the final models between those who reported burn outcomes and those that did not.**

Sample size varies depending on completeness of each variable. Continuous variables are reported using means and standard error and categorical variables as proportions with 95% confidence intervals.

| <b>Variables</b>              | <b>With outcome</b> | <b>N (max 9558)</b> | <b>Missing outcome</b> | <b>N (max 3438)</b> | <b>P-value*</b> |
|-------------------------------|---------------------|---------------------|------------------------|---------------------|-----------------|
| <i>0-2y</i>                   |                     |                     |                        |                     |                 |
| Gender                        | 51.9 [50.8, 52.9]   | 9558                | 50.7 [49.0, 52.4]      | 3438                | 0.25            |
| - Male                        |                     |                     |                        |                     |                 |
| Gross motor score             | 16.2 [0.06]         | 9439                | 17.4 [0.16]            | 1951                | <0.001          |
| Fine motor score              | 26.7 [0.08]         | 9286                | 26.7 [0.03]            | 1753                | 0.38            |
| Maternal education            |                     |                     |                        |                     |                 |
| - Degree                      | 14.8 [14.1, 15.5]   | 9314                | 7.6 [6.6, 8.7]         | 2496                | <0.001          |
| Maternal parenting score      |                     |                     |                        |                     |                 |
| - Worst decile                | 10.8 [10.2, 11.4]   | 9463                | 14.3 [ 12.9, 15.9]     | 1978                | <0.001          |
| Marital status                |                     |                     |                        |                     |                 |
| - Never married               | 14.9 [14.2, 15.6]   | 9382                | 28.6 [26.9, 30.3]      | 2705                | <0.001          |
| Family Adversity Index        | 1.16 [0.02]         | 9558                | 1.60 [0.03]            | 3028                | <0.001          |
| Index of Multiple Deprivation |                     |                     |                        |                     |                 |
| - Most deprived quintile      | 18.4 [17.6, 19.2]   | 8566                | 27.6 [25.5, 29.7]      | 1764                | <0.001          |
|                               | <b>With outcome</b> | <b>N (max 9039)</b> | <b>Missing outcome</b> | <b>N (max 3957)</b> | <b>P-value*</b> |
| <i>2-4.5y</i>                 |                     |                     |                        |                     |                 |
| Gender                        | 51.7 [50.7, 52.7]   | 9039                | 51.2 [49.6, 52.7]      | 3957                | 0.58            |
| - Male                        |                     |                     |                        |                     |                 |
| Gross motor score             | 16.1 [0.06]         | 8633                | 17.3 [0.13]            | 2757                | <0.001          |
| Fine motor score              | 26.7 [0.03]         | 8691                | 26.6 [0.07]            | 2348                | 0.39            |
| Temper tantrums               |                     |                     |                        |                     |                 |
| - Often                       | 27.8 [26.9, 28.8]   | 8635                | 30.9 [29.0, 32.8]      | 2329                | 0.01            |
| Maternal education            |                     |                     |                        |                     |                 |

|                               |                     |                      |                        |                     |                 |
|-------------------------------|---------------------|----------------------|------------------------|---------------------|-----------------|
| - Degree                      | 14.9 [14.2, 15.7]   | 8794                 | 8.4 [7.5, 9.4]         | 3016                | <0.001          |
| Maternal parenting score      |                     |                      |                        |                     |                 |
| - Worst decile                | 10.4 [9.8, 11.0]    | 8655                 | 14.5 [13.2, 15.9]      | 2786                | <0.001          |
| Marital status                |                     |                      |                        |                     |                 |
| - Never married               | 15.0 [14.2, 15.7]   | 8856                 | 26.3 [24.8, 27.8]      | 3231                | <0.001          |
| Family Adversity Index        | 1.14 [0.02]         | 9039                 | 1.59 [0.03]            | 3547                | <0.001          |
| Index of Multiple Deprivation |                     |                      |                        |                     |                 |
| - Most deprived quintile      | 18.5 [17.7, 19.4]   | 8355                 | 27.4 [24.7, 30.2]      | 1045                | <0.001          |
|                               | <b>With outcome</b> | <b>N (max 5906 )</b> | <b>Missing outcome</b> | <b>N (max 7090)</b> | <b>P-value*</b> |
| <i>5-11y</i>                  |                     |                      |                        |                     |                 |
| Gender                        | 50.2 [49.0, 51.5]   | 5906                 | 52.6 [51.5, 53.8]      | 7090                | 0.006           |
| - Male                        |                     |                      |                        |                     |                 |
| Gross motor score             | 26.3 [0.05]         | 5713                 | 26.4 [0.06]            | 4293                | 0.04            |
| Fine motor score              | 29.9 [0.05]         | 5710                 | 29.5 [0.06]            | 4289                | <0.001          |
| Temper tantrums               |                     |                      |                        |                     |                 |
| - Often                       | 15.0 [14.1, 15.9]   | 5670                 | 17.7 [16.6, 18.9]      | 4272                | <0.001          |
| Hyperactivity                 |                     |                      |                        |                     |                 |
| - Abnormal                    | 13.2 [12.3, 14.1]   | 5656                 | 15.4 [14.3, 16.6]      | 3856                | 0.002           |
| Conduct problems              |                     |                      |                        |                     |                 |
| - Abnormal                    | 12.1 [14.3, 16.6]   | 5656                 | 14.5 [13.5, 15.7]      | 3856                | <0.001          |
| Coordination problems         |                     |                      |                        |                     |                 |
| - Yes                         | 3.3 [2.9, 3.9]      | 5683                 | 4.0 [3.5, 4.7]         | 3977                | 0.09            |
| Handedness                    |                     |                      |                        |                     |                 |
| - Left/mixed                  | 32.7 [31.4, 33.9]   | 5690                 | 37.7 [36.2, 39.1]      | 4260                | <0.001          |
| Maternal education            |                     |                      |                        |                     |                 |
| - Degree                      | 18.3 [17.4, 19.4]   | 5790                 | 8.4 [7.7, 9.1]         | 6020                | <0.001          |
| Maternal parenting score      |                     |                      |                        |                     |                 |
| - Worst decile                | 8.8 [8.1, 9.5]      | 5760                 | 11.1 [10.2, 11.9]      | 5276                | <0.001          |
| Marital status                |                     |                      |                        |                     |                 |
| - Never married               | 12.2 [11.3, 13.0]   | 5809                 | 23.4 [22.3, 24.4]      | 6278                | <0.001          |
| Family Adversity Index        | 1.00 [0.02]         | 5884                 | 1.50 [0.02]            | 6702                | <0.001          |
| Index of Multiple Deprivation |                     |                      |                        |                     |                 |
| - Most deprived quintile      | 16.0 [15.0, 17.0]   | 5371                 | 24.8 [23.2, 26.5]      | 2536                | <0.001          |

\* P-values are reported using Chi-square tests for categorical variables and t-tests for continuous variables.

**Supplementary table S6. Comparison of results from the fully adjusted model 3 between complete case analysis and multiple imputation analysis.**

| Measure<br>(non-reference group) | Age outcome | Complete case |            | Multiple Imputation |            |
|----------------------------------|-------------|---------------|------------|---------------------|------------|
|                                  |             | OR            | 95% CI     | OR                  | 95% CI     |
| Gender (male)                    | 0-2y        | 1.37          | 1.21, 1.56 | 1.32                | 1.18, 1.49 |
| Gross motor score                | 0-2y        | 1.03          | 1.02, 1.04 | 1.03                | 1.02, 1.03 |
| Fine motor score                 | 0-2y        | 0.99          | 0.96, 1.01 | 0.99                | 0.97, 1.01 |
| Gender (male)                    | 2-4.5y      | 1.08          | 0.93, 1.25 | 1.10                | 0.97, 1.26 |
| Gross motor score                | 2-4.5y      | 1.01          | 1.00, 1.02 | 1.01                | 0.99, 1.02 |
| Fine motor score                 | 2-4.5y      | 0.98          | 0.95, 1.00 | 0.98                | 0.96, 1.01 |
| Temper tantrums (often)          | 2-4.5y      | 1.11          | 0.85, 1.44 | 1.16                | 0.91, 1.48 |
| Gender (male)                    | 5-11y       | 0.87          | 0.72, 1.05 | 0.78                | 0.64, 0.95 |
| Gross motor score                | 5-11y       | 0.97          | 0.94, 1.00 | 0.98                | 0.95, 1.01 |
| Fine motor score                 | 5-11y       | 1.03          | 1.00, 1.05 | 1.02                | 1.00, 1.04 |
| Temper tantrums (often)          | 5-11y       | 1.44          | 1.04, 1.99 | 1.41                | 1.04, 1.92 |
| Hyperactivity (abnormal)         | 5-11y       | 1.19          | 0.91, 1.55 | 1.24                | 1.01, 1.54 |
| Conduct problems (abnormal)      | 5-11y       | 1.17          | 0.89, 1.54 | 1.20                | 0.96, 1.50 |
| Coordination problems (yes)      | 5-11y       | 1.71          | 1.13, 2.58 | 1.69                | 1.21, 2.35 |
| Handedness (left/mixed)          | 5-11y       | 0.87          | 0.72, 1.06 | 0.93                | 0.76, 1.15 |

Gross motor and fine motor scores entered as continuous variables.
